# Supplementary material for: Abnormalities of plasma cytokines and spleen in senile APP/PS1/Tau transgenic mouse model
Source: PubMed Central journal article supplement (PMC4621607; doi:10.1038/srep15703), 2015-10-27

## **SUPPLEMENTARY INFORMATION**

### **Abnormalities of plasma cytokines and spleen in senile APP/PS1/Tau transgenic mouse model**

Seung-Hoon Yang, Jiyeon Kim, Michael Jisoo Lee & YoungSoo Kim

#### **Supplementary methods**

##### **Genotyping**

PCR analysis of genomic DNA from the spleen and western blot of total lysate from the brain and spleen were used for genotyping of 3xTg-AD mice as previously described<sup>1,2</sup>. For APP transgene, splenic DNA was isolated by genomic DNA lysis buffer (100 mM Tris, 200 mM NaCl, 5 mM EDTA, 0.2% SDS), and then was amplified by PCR analysis. Expected product of APP transgene is 377 bp. For PS1 transgene, splenic DNA was digested by BstEII restriction enzyme after DNA extraction. Total PCR product of PS1 transgene is 530 bp. After BstEII enzyme digestion, expected product sizes of PS1 transgene are 350 bp and 180 bp. For western blot, the brain and spleen were lysed in tissue lysis buffer (1% SDS, 10 mM Tris). The lysates were separated by gel electrophoresis and transferred onto nitrocellulose membrane. Primary antibody was mouse anti-amyloid- $\beta$  (6E10 clone, Covance). Blots were developed with the ECL solution (Bio-Rad) following the manufacturer instruction manual.

## **Supplementary figure legends**

### **Supplementary figure S1. Reduced body weight and increased spleen weight.**

(A) Gender-matched individual body weight values in the wild-type (Wt) and 3xTg-AD mice at the age of 24 months. (B) Gender-matched individual spleen weight values in the wild-type (Wt) and 3xTg-AD mice at that age of 14 and 24 months.

### **Supplementary figure S2. Genotypes of 3xTg-AD mice.**

(A) Expression of APP1 and PS1 transgene in the spleen of wild-type (Wt) and 3xTg-AD mice at the age of 14 months. (B) APP and Tau protein expression levels in the brain and spleen of wild-type (Wt) and 3xTg-AD mice at the age of 14 months.

### Supplementary references

- 1 Guo, Q. *et al.* Increased vulnerability of hippocampal neurons to excitotoxic necrosis in presenilin-1 mutant knock-in mice. *Nat Med* **5**, 101-106, doi:10.1038/4789 (1999).
- 2 Oddo, S. *et al.* Triple-transgenic model of Alzheimer's disease with plaques and tangles: intracellular A $\beta$  and synaptic dysfunction. *Neuron* **39**, 409-421 (2003).

**A**

| 24 month |            |          |            |
|----------|------------|----------|------------|
| Wt (g)   |            | 3xTg (g) |            |
| Gender   | Weight (g) | Gender   | Weight (g) |
| male     | 40.9       | male     | 27.3       |
| male     | 44.2       | male     | 31.3       |
| male     | 44.2       | male     | 30.8       |
| male     | 38.8       | male     | 30.2       |
| female   | 36.2       | female   | 27.3       |
| female   | 35.8       | female   | 30.1       |
| female   | 36.5       | female   | 31.6       |
|          |            | female   | 27.1       |

**B**

| 14 month |             |        |             | 24 month |             |        |             |
|----------|-------------|--------|-------------|----------|-------------|--------|-------------|
| Wt       |             | 3xTg   |             | Wt       |             | 3xTg   |             |
| Gender   | Weight (mg) | Gender | Weight (mg) | Gender   | Weight (mg) | Gender | Weight (mg) |
| male     | 112         | male   | 455         | male     | 129         | male   | 791         |
| male     | 81          | male   | 831         | male     | 128         | male   | 730         |
| male     | 93          | male   | 997         | male     | 132         | male   | 448         |
| female   | 121         | male   | 326         | male     | 98          | male   | 583         |
| female   | 104         | female | 3900        | female   | 98          | female | 350         |
|          |             | female | 973         | female   | 109         | female | 3940        |
|          |             | female | 368         | female   | 117         | female | 408         |
|          |             | female | 200         |          |             | female | 1072        |
|          |             | female | 222         |          |             |        |             |

**A**

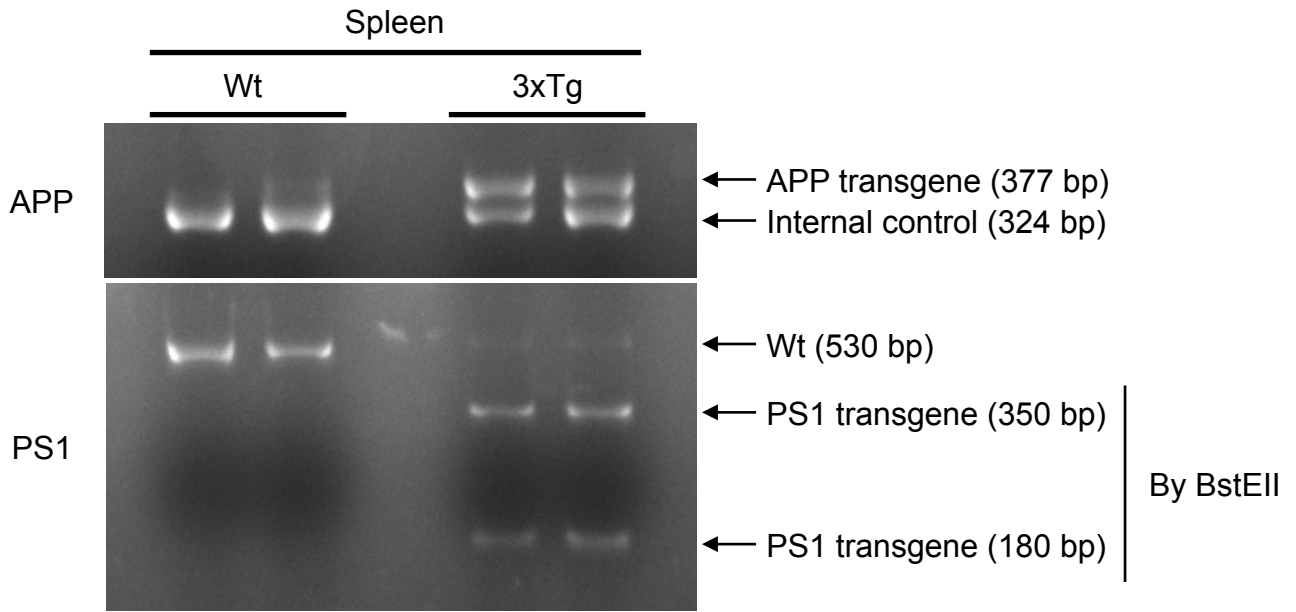

**B**

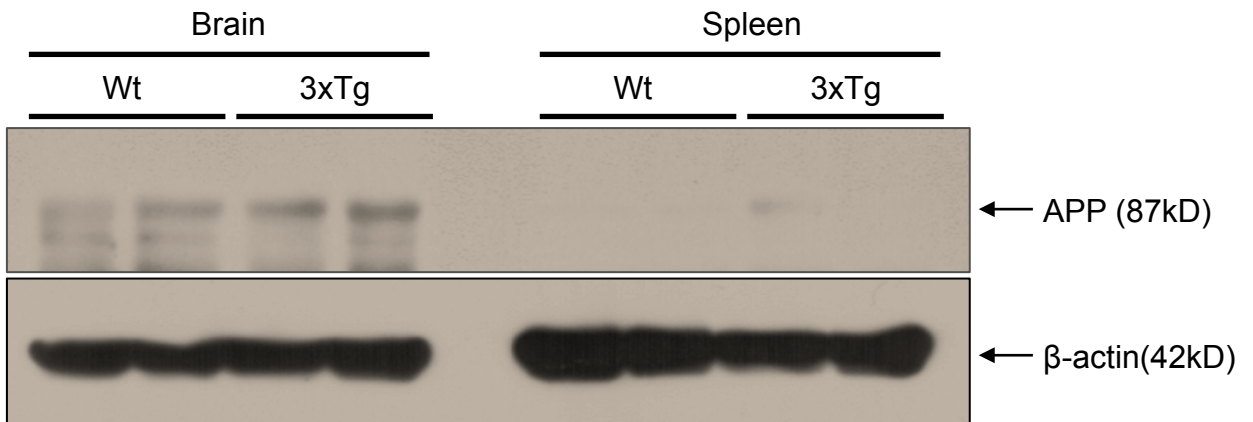

Supplement: srep15703-s1.pdf [file srep15703-s1.pdf]
